# Supplementary material for: Viscoelastic microfluidics for enhanced separation resolution of submicron particles and extracellular vesicles
Source: Royal Society of Chemistry journal article supplement (doi:10.1039/d3nr05410a), 2024-01-01
Supplement: d3nr05410a1.pdf [file d3nr05410a1.pdf]

## Supplementary information

### Viscoelastic microfluidics for enhanced separation resolution of submicron particles and extracellular vesicles

Samith Hettiarachchi,<sup>1</sup>Lingxi Ouyang,<sup>1</sup> Haotian Cha,<sup>1</sup> Helena H.W.B. Hansen,<sup>1</sup> Nam-Trung Nguyen <sup>1\*</sup> and Jun Zhang <sup>1\*</sup>

<sup>1</sup> Queensland Micro- and Nanotechnology Centre, Griffith University, Nathan, Queensland 4111, Australia. E-mail: nam-trung.nguyen@griffith.edu.au, jun.zhang@griffith.edu.au

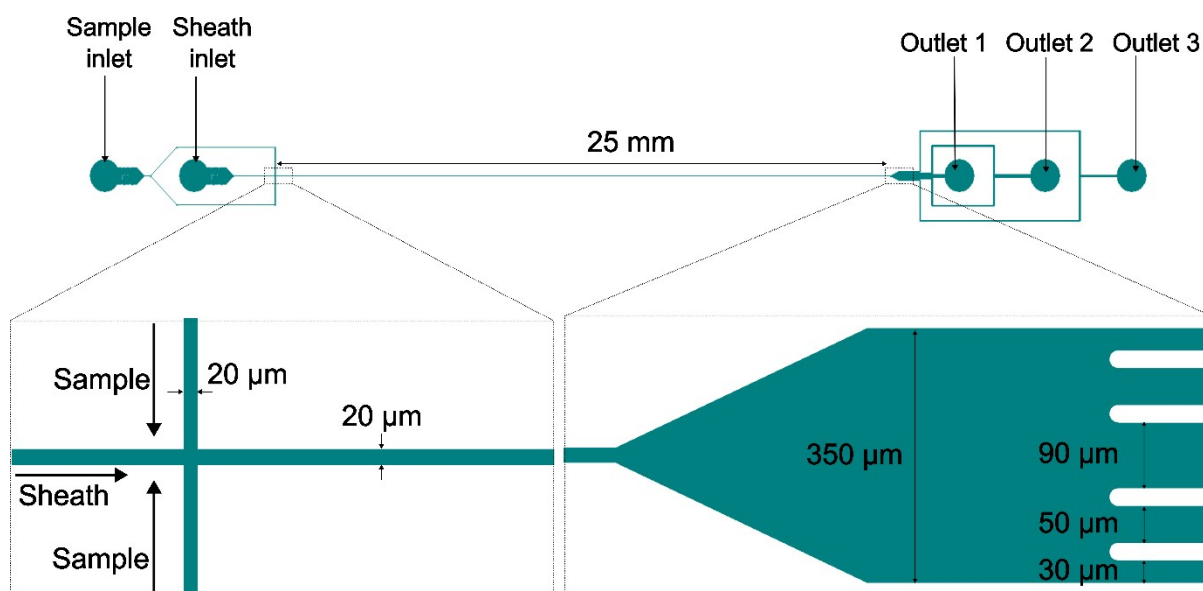

**Fig. S1.** CAD design of the co-flow microfluidic device.

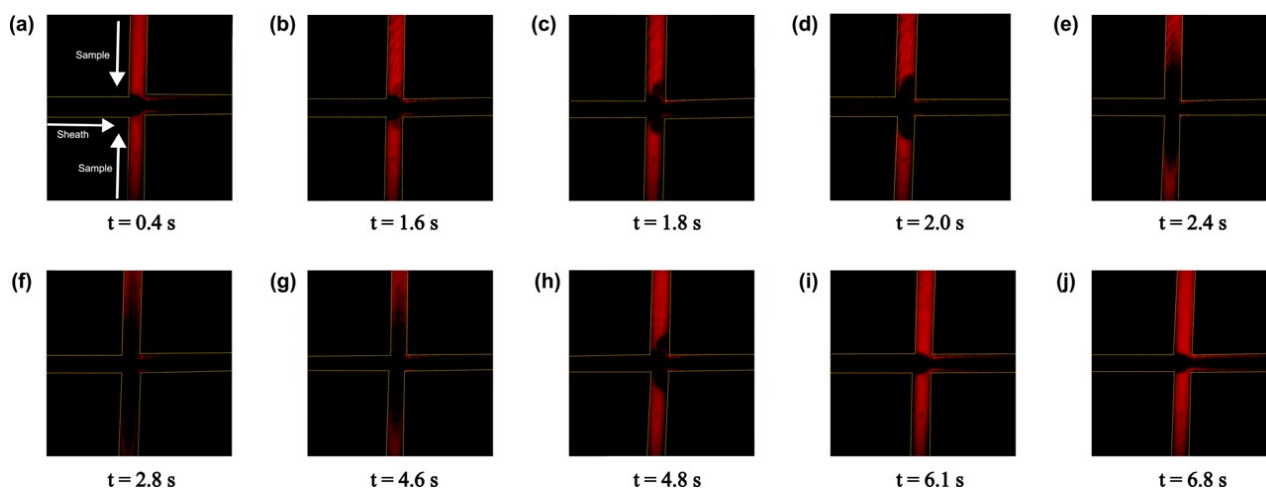

**Fig S2.** Time-lapse images of the flow oscillation in 5,000 ppm PEO concentration for 100 nm particles (pseudo-coloured red) at the cross junction of the microfluidic device. (a) The particles from the side channels flow into the main straight channel at  $t = 0.4$  s. (b)-(e) Gradually sheath flow from the middle becomes dominant and pushes the particle flow towards the inlet from  $t = 1.6$  s to  $t = 2.4$  s. (f) Particles are completely pushed beyond the boundary of the microscopic focusing area at  $t = 2.8$  s. (g)-(i) Sample flow overcomes the resistance of the sheath flow and gradually flows towards the straight section of the microfluidic device through the coss junction from  $t = 4.6$  s to  $t = 6$  s. (j) The particles from the side channels flow into the main straight channel as usual at  $t = 6.8$  s.

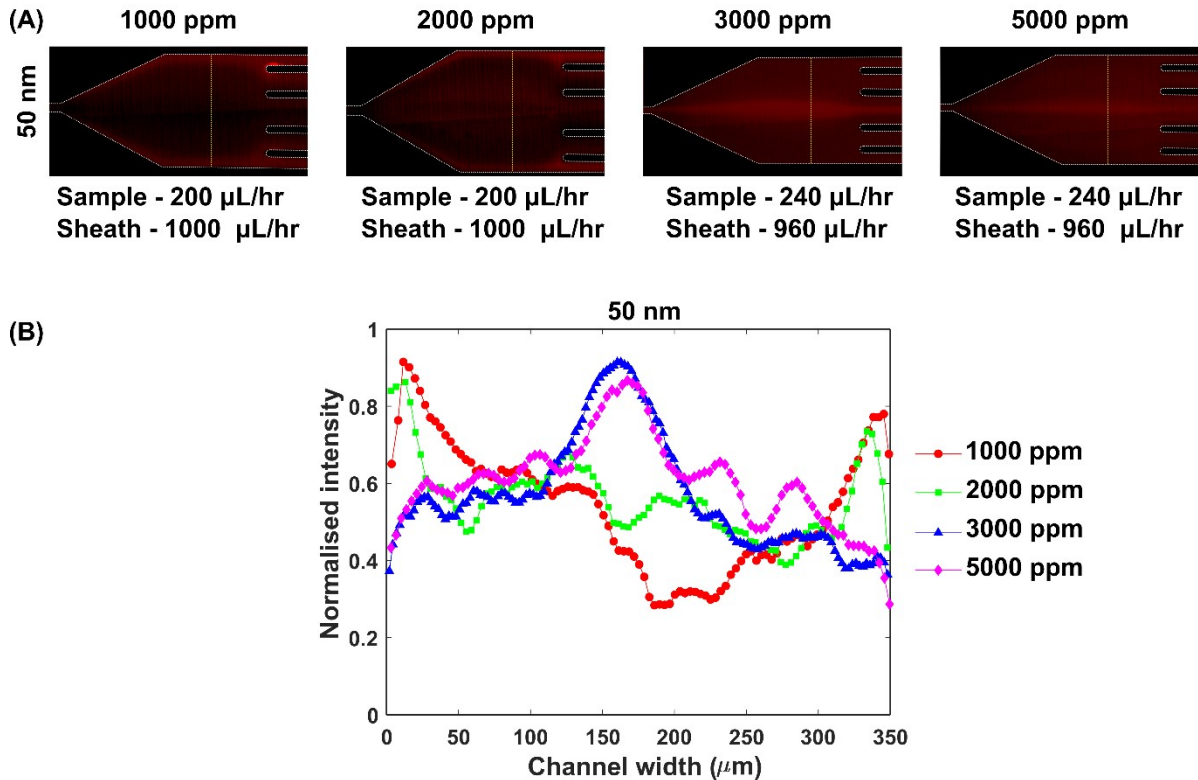

**Fig. S3(A)** Fluorescent trajectories of 50-nm (pseudo-coloured red) polystyrene particles at the expansion region of the co-flow microfluidic device under different PEO concentrations. When increasing the PEO concentration to 3,000 ppm or above, we observed 50-nm particles migrated from the channel side walls toward the channel centre. Due to the flow oscillations at PEO concentrations of 3,000 ppm and 5,000 ppm, we used a flow rate ratio of 4:1 for those PEO concentrations to ensure the flow is stable. (B) Normalised fluorescence intensity of particle distribution across the yellow dotted line.

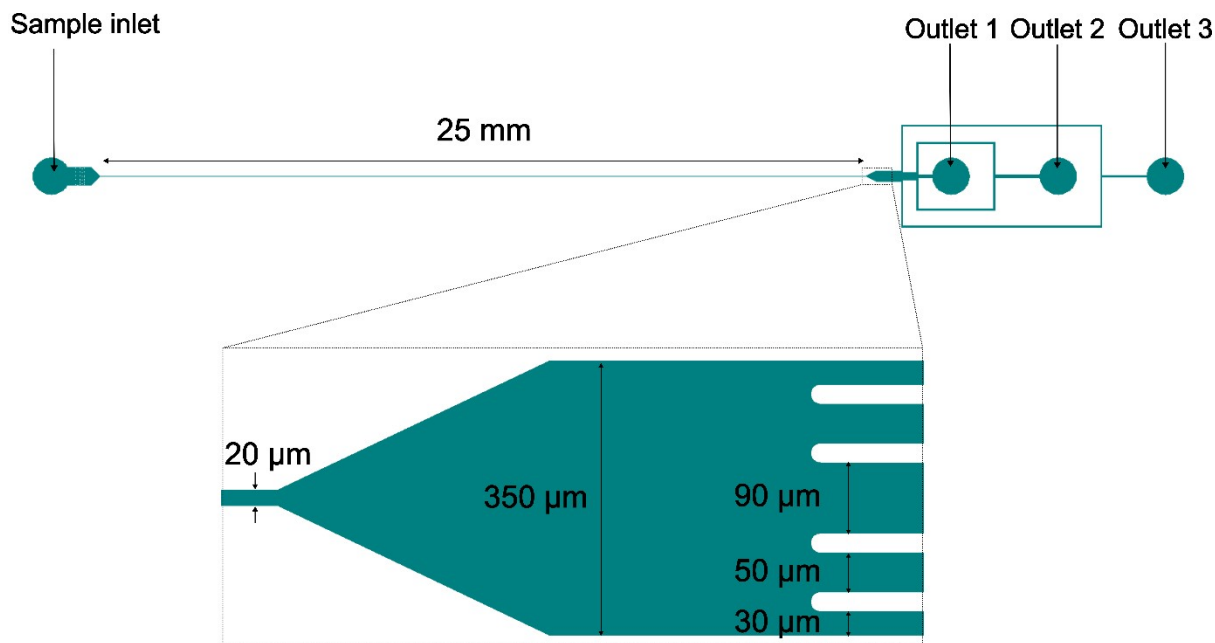

**Fig. S4.** CAD design of the sheathless microfluidic device used for high concentration PEO concentration experiments to investigate the focusing of nanoparticles.

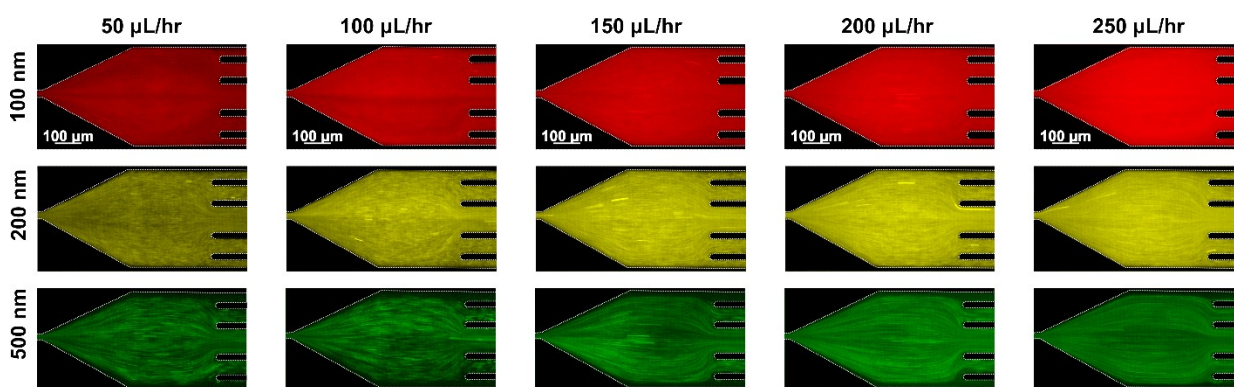

**Fig. S5.** Fluorescent trajectories of 100-nm (pseudo-coloured red), 200-nm (pseudo-coloured yellow) and 500-nm (pseudo-coloured green) polystyrene particles at the expansion region of the sheathless microfluidic device for 5,000 ppm PEO aqueous solution.

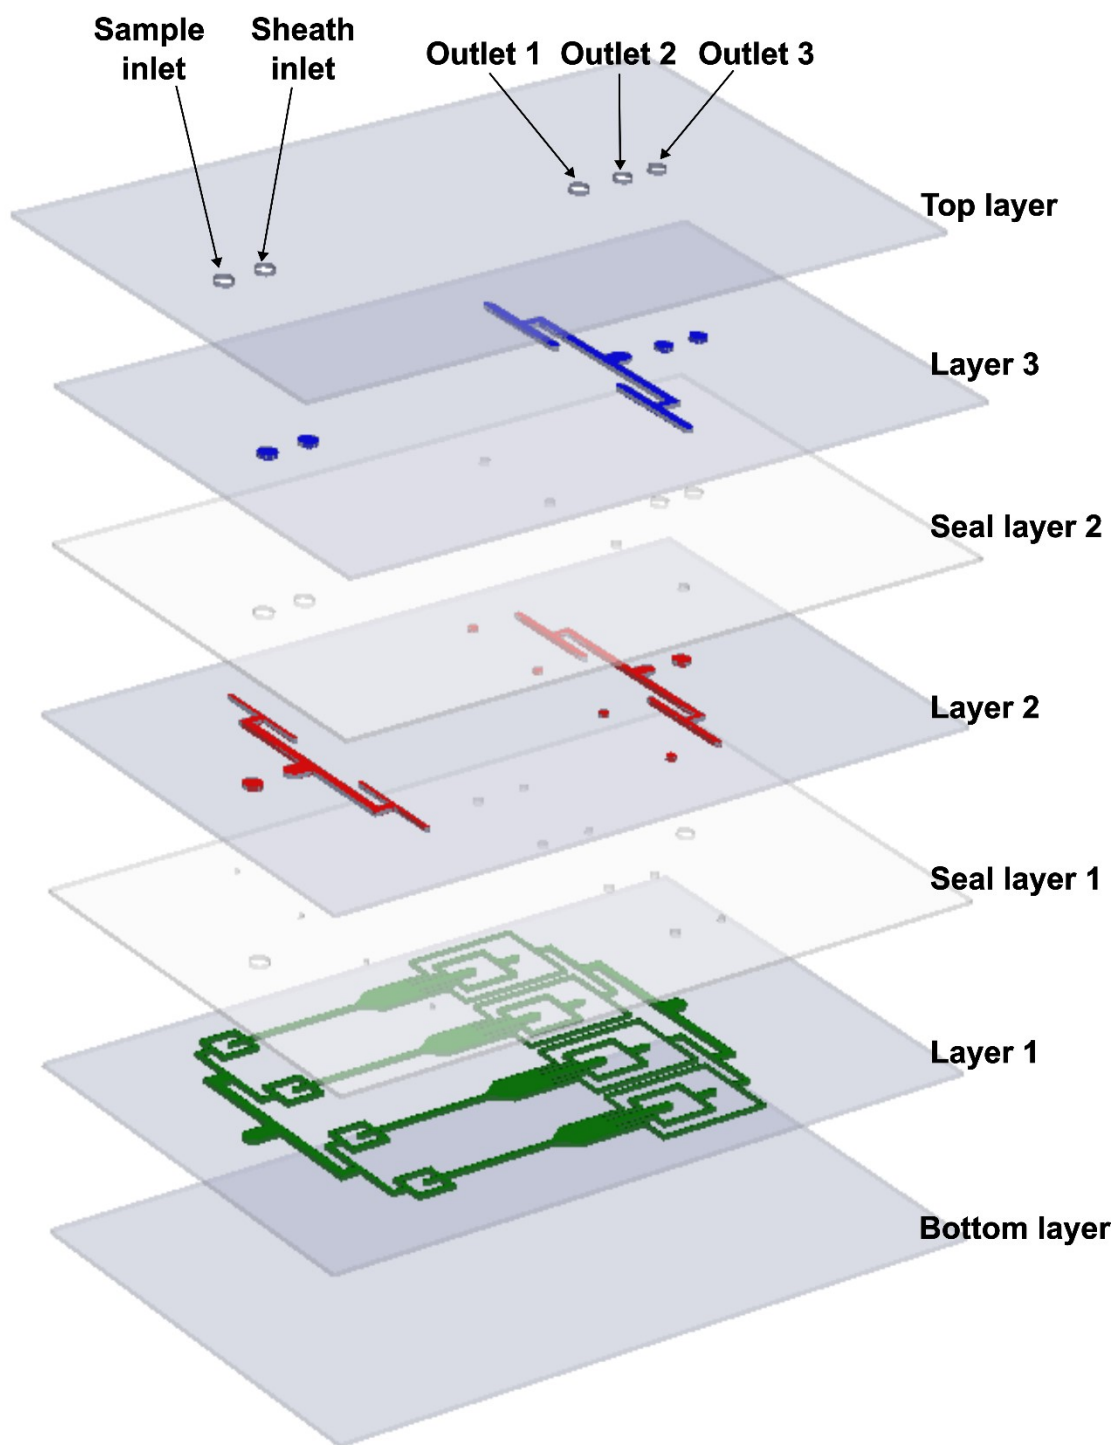

**Fig. S6.** Design of a parallelised microfluidic device with straight channels to enhance the throughput.

Table S1 Summary of submicron and nanoparticle separation techniques

| Separation mechanism               | Particle sizes    | Separation resolution | Biological particles              | Separation purity | Separation efficiency | Throughput                     | References        |
|------------------------------------|-------------------|-----------------------|-----------------------------------|-------------------|-----------------------|--------------------------------|-------------------|
| Ultracentrifugation                | 50–200 nm         | 100-150 nm            | Exosomes, EVs                     | N/A               | 23% - 70%             | 53 $\mu$ L/min                 | 1-3               |
| Ultrafiltration                    | 50-250 nm         | 150 nm                | Exosomes, natural organic matters | 91.5%             | 70% - 82%             | 16 mL/min                      | 4-6               |
| Size exclusion chromatography      | 50–200 nm         | 120-150 nm            | Exosomes                          | N/A               | 80%-90%               | 0.5 mL/min                     | 7-9               |
| Acoustophoresis                    | 100–900 nm        | 230 nm                | EVs                               | 98%               | > 90%                 | 4–80 $\mu$ L/min               | 10                |
| Electrophoresis                    | 100-1,000 nm      | 400 nm                | Exosomes                          | N/A               | 65% - 98%             | 1 $\mu$ L/min                  | 11                |
| Magnetophoresis                    | 5 nm-200 nm       | 800 nm                | EVs                               | 80%               | 80% - 90%             | 2.5 $\mu$ L/min                | 12                |
| Inertial microfluidics             | 200 nm–2 $\mu$ m  | 800 nm                | EVs                               | N/A               | 15% - 97%             | 80 $\mu$ L/min                 | 13,14             |
| Deterministic lateral displacement | 51 nm-1.5 $\mu$ m | 150 nm                | EVs                               | 98%               | 39%                   | 0.05 $\mu$ L/min               | 15,16             |
| Microfluidic filtration            | 30–200 nm         | 150 nm                | Exosomes                          | N/A               | 74%                   | 40 $\mu$ L/min                 | 17                |
| Pinched flow fractionation         | 30 nm–2 $\mu$ m   | 400 nm                | EVs                               | N/A               | 70% - 90%             | 20 $\mu$ L/min                 | 18                |
| Viscoelastic microfluidics         | 100 nm– 2 $\mu$ m | 400 nm                | Exosomes, EVs                     | 96%               | 93%                   | 3 $\mu$ L/min                  | 19,20             |
| <b>Viscoelastic microfluidics</b>  | <b>100–500 nm</b> | <b>100 nm</b>         | <b>EVs</b>                        | <b>40% - 90 %</b> | <b>50% - 86%</b>      | <b>3 <math>\mu</math>L/min</b> | <b>This study</b> |

## References

- 1 G. K. Patel, M. A. Khan, H. Zubair, S. K. Srivastava, M. Khushman, S. Singh and A. P. Singh, *Sci. Rep.*, 2019, **9**, 5335.
- 2 M. A. Livshits, E. Khomyakova, E. G. Evtushenko, V. N. Lazarev, N. A. Kulemin, S. E. Semina, E. V. Generozov and V. M. Govorun, *Sci. Rep.*, 2015, **5**, 17319.
- 3 H. G. Lamparski, A. Metha-Damani, J.-Y. Yao, S. Patel, D.-H. Hsu, C. Ruegg and J.-B. Le Pecq, *J. Immunol. Methods*, 2002, **270**, 211–226.
- 4 J. Lohwacharin and S. Takizawa, *J. Membr. Sci.*, 2009, **326**, 354–362.
- 5 R. J. Lobb, M. Becker, S. Wen Wen, C. S. F. Wong, A. P. Wiegman, A. Leimgruber and A. Möller, *J. Extracell. Vesicles*, 2015, **4**, 27031.
- 6 A. Cheruvanky, H. Zhou, T. Pisitkun, J. B. Kopp, M. A. Knepper, P. S. T. Yuen and R. A. Star, *Am. J. Physiol.-Ren. Physiol.*, 2007, **292**, F1657–F1661.
- 7 C.-S. Hong, S. Funk, L. Muller, M. Boyiadzis and T. L. Whiteside, *J. Extracell. Vesicles*, 2016, **5**, 29289.
- 8 F. A. W. Coumans, A. R. Brisson, E. I. Buzas, F. Dignat-George, E. E. E. Drees, S. El-Andaloussi, C. Emanuelli, A. Gasecka, A. Hendrix, A. F. Hill, R. Lacroix, Y. Lee, T. G. van Leeuwen, N. Mackman, I. Mäger, J. P. Nolan, E. van der Pol, D. M. Pegtel, S. Sahoo, P. R. M. Siljander, G. Sturk, O. de Wever and R. Nieuwland, *Circ. Res.*, 2017, **120**, 1632–1648.
- 9 T. Baranyai, K. Herczeg, Z. Onódi, I. Voszka, K. Módos, N. Marton, G. Nagy, I. Mäger, M. J. Wood, S. E. Andaloussi, Z. Pálkás, V. Kumar, P. Nagy, Á. Kittel, E. I. Buzás, P. Ferdinandy and Z. Giricz, *PLOS ONE*, 2015, **10**, e0145686.
- 10 M. Wu, Y. Ouyang, Z. Wang, R. Zhang, P.-H. Huang, C. Chen, H. Li, P. Li, D. Quinn, M. Dao, S. Suresh, Y. Sadvosky and T. J. Huang, *Proc. Natl. Acad. Sci.*, 2017, **114**, 10584–10589.
- 11 R. T. Davies, J. Kim, S. C. Jang, E.-J. Choi, Y. S. Ghoo and J. Park, *Lab. Chip*, 2012, **12**, 5202–5210.
- 12 L. Zeng, S. Hu, X. Chen, P. Zhang, G. Gu, Y. Wang, H. Zhang, Y. Zhang and H. Yang, *Lab. Chip*, 2022, **22**, 2476–2488.
- 13 L. Wang and D. S. Dandy, *Adv. Sci.*, 2017, **4**, 1700153.
- 14 H. M. Tay, S. Kharel, R. Dalan, Z. J. Chen, K. K. Tan, B. O. Boehm, S. C. J. Loo and H. W. Hou, *NPG Asia Mater.*, 2017, **9**, e434–e434.
- 15 K. K. Zeming, N. V. Thakor, Y. Zhang and C.-H. Chen, *Lab. Chip*, 2015, **16**, 75–85.
- 16 S. M. Santana, M. A. Antonyak, R. A. Cerione and B. J. Kirby, *Biomed. Microdevices*, 2014, **16**, 869–877.
- 17 F. Inci, *Langmuir*, 2022, **38**, 1897–1909.
- 18 S. Shin, D. Han, M. C. Park, J. Y. Mun, J. Choi, H. Chun, S. Kim and J. W. Hong, *Sci. Rep.*, 2017, **7**, 9907.
- 19 C. Liu, J. Guo, F. Tian, N. Yang, F. Yan, Y. Ding, J. Wei, G. Hu, G. Nie and J. Sun, *ACS Nano*, 2017, **11**, 6968–6976.
- 20 C. Liu, J. Zhao, F. Tian, J. Chang, W. Zhang and J. Sun, *J. Am. Chem. Soc.*, 2019, **141**, 3817–3821.
